# Supplementary material for: Hatchery-Imposed Selection Does Not Impact the Genetic Diversity of Australian Farmed Blue Mussels (Mytilus spp.)
Source: MDPI journal article supplement (doi:10.3390/hydrobiology3010004), 2024-03-02
Supplement: s1 [file s1]

Supplementary Table S1: A summary of all microsatellite markers used in this study. Markers were obtained from (Nguyen, et al. 2011).

| <i>Primer name</i>  | <i>Primer sequence 5' -3'</i> | <i>Amplicon size</i> | <i>Optimal ann. temp.</i> |
|---------------------|-------------------------------|----------------------|---------------------------|
| <i>MgU2-HEX F</i>   | GGGATCGTTCAATAAGTTC           | 80-100 bp            | 45°C                      |
| <i>MgU2-HEX R</i>   | AAATTTTACTGAATAAATAAATCG      |                      |                           |
| <i>MT203-HEX F</i>  | GTTTTCCGAATGGCGAGAT           | 170-190 bp           | 45°C                      |
| <i>MT203-HEX R</i>  | ACAACCAGTTCAATAGCGACA         |                      |                           |
| <i>MGE005-FAM F</i> | CGTTGCCATCGTTTATTTT           | 240-250 bp           | 45°C                      |
| <i>MGE005-FAM R</i> | GTTGTAAGTCGTGTTGGTTCA         |                      |                           |
| <i>Med744-HEX F</i> | TTTTTTCATCGTGTTTGGTTG         | 190-250 bp           | 45°C                      |
| <i>Med744-HEX R</i> | CGCCATGGAATAGCCAATAG          |                      |                           |
| <i>My048-FAM F</i>  | ACGCACCAAGACTGTAACAA          | 170-230 bp           | 50°C                      |
| <i>My048-FAM R</i>  | TCCCACATAGACAACAACCA          |                      |                           |
| <i>MgU3-HEX F</i>   | AAACTAAAACTTCATCTAATCCC       | 130-140 bp           | 45°C                      |
| <i>MgU3-HEX R</i>   | AAGCAATCCAAAGTGAGAGG          |                      |                           |

Nguyen T, Hayes B, Guthridge K, Ab Rahim E, Ingram B. 2011. Use of a microsatellite-based pedigree in estimation of heritabilities for economic traits in Australian blue mussel, *Mytilus galloprovincialis*. *Journal of Animal Breeding and Genetics* 128:482-490.
